# Supplementary material
Source: PubMed Central journal article supplement (PMC7079824)
Supplement: 251_2011_555_MOESM1_ESM.pdf [file 251_2011_555_MOESM1_ESM.pdf]

## Online Resource 1

|                                |                                                                                                                                                                                                                                                                                                                                                                                                                                                                                                                                                                                                                                                                                                                                                                                                                                                                                                                                                                                                                                                                     |
|--------------------------------|---------------------------------------------------------------------------------------------------------------------------------------------------------------------------------------------------------------------------------------------------------------------------------------------------------------------------------------------------------------------------------------------------------------------------------------------------------------------------------------------------------------------------------------------------------------------------------------------------------------------------------------------------------------------------------------------------------------------------------------------------------------------------------------------------------------------------------------------------------------------------------------------------------------------------------------------------------------------------------------------------------------------------------------------------------------------|
| SLA-1*0401 nucleotide sequence | ATGGGCCCGCACAGCCTGAGCTATTTTTATACCGCGGTGAGCCGTCC<br>GGATCGTGGTGATAGCCGTTTTATTGCGGTGGGTTATGTGGATGAT<br>ACCCAGTTTGTGCGTTTTGATAATTATGCGCCAATCCGCGTATGG<br>AACCGCGTGTCCGTGGATTTCAGCAGGAAGGTCAGGAATATTGGGA<br>TCGTGAAACCCGTAATGTGAAAGAAACCGCGCAGACCTATGGTGTG<br>GGTCTGAATACCCTGCGTGGTTATTATAATCAGAGCGAAGCGGGTA<br>GCCATACCCTGCAGAGCATGTATGGTTGTTATCTGGGTCCGGATGG<br>TCTGCTGCTGCATGGTTATCGTCAGGATGCGTATGATGGTCCGGAT<br>TATATTGCGCTGAATGAAGATCTGCGTAGCTGGACCGCGGCGGATA<br>TGGCGGCGCAGATTACCAAACGTAAATGGGAAGCGGCGGATGAAGC<br>GGAACGTCGTCGTAGCTATCTGCAGGGTCTGTGTGGAAAGCCTG<br>CGTCGTTATCTGGAAATGGGTAAAGATACCCTGCAGCGTGCAGAAC<br>CGCCGAAAACCCATGTGACCCGTCATCCGAGCAGCGATCTGGGTGTG<br>ACCCTGCGTTGTTGGGCGCTGGGTTTTTATCCGAAAGAAATTAGCC<br>TGACCTGGCAGCGTGAAGGTCAGGATCAGAGCCAGGATATGGAAC<br>GGTGAAACCCGTCAGCGGTGATGGTACCTTTCAGAAATGGGCG<br>GCGCTGGTGGTGCCCGGGTGAAGAACAGAGCTATACCTGTCATG<br>TGCAGCATGAAGGCTGCAGGAACCGCTGACCTGCGTTGGGATCCG<br>ATCGAGGGTAGAGGTGGCGGTCTGAACGACATCTCGAAGCTCAGA<br>AAATCGAATGGCACGAAGTTCCAAAGACCACCTGATCCACAACGT<br>TCACAAAGAAGAACACGCTCACGCTCACAACAAATAA |
|--------------------------------|---------------------------------------------------------------------------------------------------------------------------------------------------------------------------------------------------------------------------------------------------------------------------------------------------------------------------------------------------------------------------------------------------------------------------------------------------------------------------------------------------------------------------------------------------------------------------------------------------------------------------------------------------------------------------------------------------------------------------------------------------------------------------------------------------------------------------------------------------------------------------------------------------------------------------------------------------------------------------------------------------------------------------------------------------------------------|

**Online Resource 1** Nucleotide sequence used to encode SLA-1\*0401 fused to an enzyme restricted cleavage site (Fxa, purple), a biotinylation site (BSP, pink), and a histidine affinity tag (HAT, dark blue).

Key: SLA-1\*0401 heavy chain sequence, Fxa (enzyme restricted cleavage site), BSP (biotinylation site), HAT (histidine affinity tag for purification), stop codon
