# Supplementary material
Source: PubMed Central journal article supplement (PMC7079824)
Supplement: 251_2011_555_MOESM3_ESM.pdf [file 251_2011_555_MOESM3_ESM.pdf]

**Online Resource 3** Comparison of pseudo sequences for the heavy chain molecules HLA-A\*01:01, SLA-1\*0401, HLA-A\*11:01, HPP ( $h\alpha_1p\alpha_2p\alpha_3$ ), and PHP ( $p\alpha_1h\alpha_2p\alpha_3$ ). Orange and purple residue numbers have an impact on binding position 9 and position 3 of the peptide, respectively. Blue residue numbers have an impact on binding position 2 of the peptide, whereas green residue numbers have an impact on binding position 1 of the peptide. Black residues show similarities between the different molecules, whereas red residues illustrate differences when compared to HLA-A\*11:01. White residue numbers on a black background indicate a difference in the pseudo sequence residues between SLA-1\*0401 and either HLA-A\*01:01 or HLA-A\*11:01 or both
